# Supplementary material for: Interaction between polymorphisms in aspirin metabolic pathways, regular aspirin use and colorectal cancer risk: A case-control study in unselected white European populations
Source: PLoS One. 2018 Feb 9;13(2):e0192223. doi: 10.1371/journal.pone.0192223 (PMC5806861; doi:10.1371/journal.pone.0192223)
Supplement: S10 Table — *P-value for association adjusted for age, sex and study site. +P-value for Cochran’s Q-test for heterogeneity. CI, Confidence Interval. (DOCX) [file pone.0192223.s013.docx]

S10 Table: Meta-analysis of association between SNP variant allele and rectal cancer risk.

| **Gene name** | **SNP ID** | **Meta-analysis Odds Ratio** | **95% CI** | ***P-*value*** | **I-squared (%)** | ***P-*value+** |
| --- | --- | --- | --- | --- | --- | --- |
| ***MDR1*** | rs1045642 | 1.05 | 0.94, 1.19 | 0.34 | 0 | 0.9 |
| ***CYP2C9*** | rs1057910 | 1.01 | 0.80, 1.27 | 0.95 | 0 | 1 |
| rs1799853 | 0.98 | 0.78, 1.22 | 0.84 | 0 | 0.86 |
| ***CCAT2*** | rs6983267 | 0.85 | 0.75, 0.95 | **0.005** | 0 | 0.84 |
| ***Intergenic* 20p12** | rs961253 | 1.12 | 0.99, 1.26 | 0.07 | 0 | 0.91 |
| ***ODC1*** | rs28362380 | 1.16 | 0.95, 1.42 | 0.16 | 0 | 0.92 |
| rs11694911 | 0.83 | 0.69, 1.00 | **0.05** | 0 | 0.9 |
| rs2430420 | 1.03 | 0.87,1.21 | 0.74 | - | - |
| rs2302615 | 0.97 | 0.81,1.16 | 0.71 | - | - |
| ***PAFAH1B2*** | rs4936367 | 1.09 | 0.90, 1.31 | 0.39 | 0 | 0.35 |
| rs7112513 | 1.08 | 0.88, 1.32 | 0.47 | 18.4 | 0.27 |
| ***PTGS1*** | rs3842787 | 1.02 | 0.81, 1.28 | 0.88 | 3 | 0.31 |
| ***PTGS2*** | rs4648310 | 0.86 | 0.63, 1.19 | 0.37 | 0 | 0.54 |
| rs20417 | 1.02 | 0.86, 1.21 | 0.82 | 17.1 | 0.27 |
| rs2745557 | 1 | 0.76, 1.32 | 1 | 67 | 0.08 |
| rs5275 | 0.92 | 0.77,1.11 | 0.39 | - | - |
| rs5277 | 1.21 | 0.97,1.51 | 0.096 | - | - |
| ***UGT1A6*** | rs1105879 | 0.96 | 0.85, 1.09 | 0.55 | 0 | 0.73 |
| rs2070959 | 0.97 | 0.86, 1.10 | 0.63 | 0 | 0.67 |
| ***IL16*** | rs12910333 | 1.03 | 0.91, 1.18 | 0.64 | 0 | 0.57 |
| ***IKBKB*** | rs11986055 | 1.15 | 0.79, 1.68 | 0.46 | 38.3 | 0.2 |
| rs10958713 | 0.99 | 0.88, 1.12 | 0.91 | 0 | 0.75 |
| rs5029748 | 1.11 | 0.91,1.36 | 0.31 | - | - |
| rs6474387 | 1.25 | 0.90,1.74 | 0.18 | - | - |
| ***NCF4*** | rs5995355 | 1.19 | 0.94, 1.50 | 0.14 | 0 | 0.67 |
| ***ALOX15*** | rs2619112 | 1.04 | 0.92, 1.17 | 0.57 | 1.1 | 0.32 |
| ***NFKB*** | rs230490 | 1.01 | 0.89, 1.13 | 0.94 | 0 | 0.33 |
| ***MGST1*** | rs2965667 | 1.16 | 0.73,1.86 | 0.53 | - | - |
| ***IL23R*** | rs6683455 | 1.33 | 1.02,1.74 | **0.04** | - | - |
| ***PGDH*** | rs7349744 | 1.31 | 0.81,2.12 | 0.26 | - | - |
| ***FLAP*** | rs17239025 | 0.62 | 0.20,1.89 | 0.4 | - | - |

**P-*value for association adjusted for age, sex and study site.

+*P*-value for Cochran’s Q-test for heterogeneity.

CI, Confidence Interval
